# Supplementary material
Source: Springer Nature journal article supplement (https://www.springermedizin.de/resource/supplementary/12970_2011_266_MOESM1_ESM.pdf/9594632)

**Pre-Training**

**Post-Training**

Muscle  
Bone  
Fascia

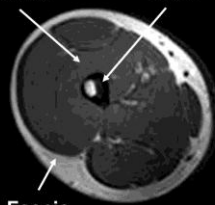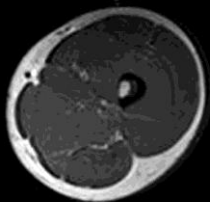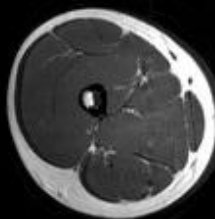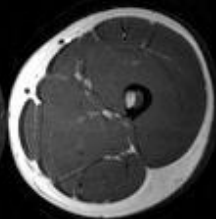

**Thigh**

**Pre-Training**

**Post-Training**

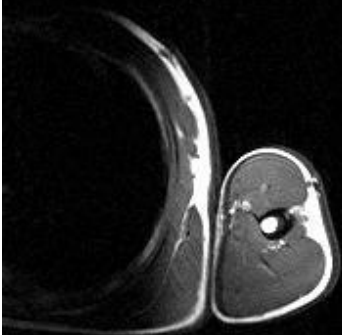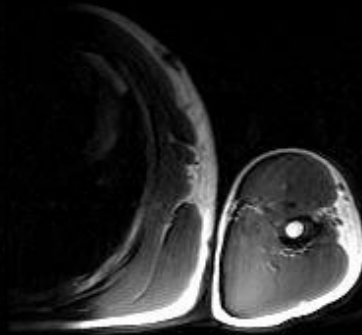

**Arm**

Supplement: MOESM1 [file 9594632]
